# Supplementary material for: Prioritization of neglected tropical zoonotic diseases: A one health perspective from Tigray region, Northern Ethiopia
Source: PLOS journal article supplement (doi:10.1371/journal.pone.0254071), 2021-07-22
Supplement: S3 (10.1371/journal.pone.0254071.s003) [file journal.pone.0254071.s003]

# Questionnaire for professionals

## Part I: Demographic Characteristics of the respondents

1. Age (yrs):-----
2. Sex: o. Male                      1. Female
3. Address :-Zone -----
4. Organization -----
5. Job Title -----
6. How long have you been in your job?    0<1 year                      1. 1 to 3 years                      2. 3to 5 years                      3. >5 years

## Part II: Specific research based questions

7. What are the major NTZD in your zone? (Multiple answer is possible)

|                                     |                                 |                                 |
|-------------------------------------|---------------------------------|---------------------------------|
| 0 Anthrax                           | 5. Leishmaniasis                | 10. Soil transmitted helminthes |
| 1. Brucellosis                      | 6. Human Africa Trypanosomiasis | 11 Food born trematods          |
| 2. Bovine tuberculosis              | 7 Leptospirosis                 |                                 |
| 3. T. Saginata cysticercosis        | 8 Rabies                        |                                 |
| 8 Cysticechnococosis (hydatidiosis) | 9 Schistosomiasis               |                                 |

8. What are the major NTZD in your zone (in your work place)?

| List of NTZD                       | Rank burden wise |      |          |     |        |
|------------------------------------|------------------|------|----------|-----|--------|
| Anthrax                            | V. High          | High | Moderate | Low | V. Low |
| Brucellosis                        |                  |      |          |     |        |
| Bovine tuberculosis                |                  |      |          |     |        |
| T.saginata (Cysticercosis)         |                  |      |          |     |        |
| Cystic echnococosis (hydatidiosis) |                  |      |          |     |        |
| Leishmaniasis                      |                  |      |          |     |        |

|                               |  |  |  |  |  |
|-------------------------------|--|--|--|--|--|
| Human African trypanosomiasis |  |  |  |  |  |
| Leptospirosis                 |  |  |  |  |  |
| Rabies                        |  |  |  |  |  |
| Schistosomiasis               |  |  |  |  |  |
| Soil transmitted Helminthes   |  |  |  |  |  |

9. What do you about the major causes (risk factors )that may aggravate the distribution and burden of NTZD ? (Multiple answer is possible)

| List of NTZD                         | Major risk factors            |                                              |                       |                                          |                                 |                   |
|--------------------------------------|-------------------------------|----------------------------------------------|-----------------------|------------------------------------------|---------------------------------|-------------------|
|                                      | Consuming raw animal products | Contact with animal, animal by-product/waste | Favorable environment | Sharing the same environment with animal | Contact with contaminated water | Lack of awareness |
| Anthrax                              |                               |                                              |                       |                                          |                                 |                   |
| Brucellosis                          |                               |                                              |                       |                                          |                                 |                   |
| Bovine tuberculosis                  |                               |                                              |                       |                                          |                                 |                   |
| T.saginata (Cysticercosis)           |                               |                                              |                       |                                          |                                 |                   |
| Cystic echinococcosis (hydatidiosis) |                               |                                              |                       |                                          |                                 |                   |
| Leishmaniasis                        |                               |                                              |                       |                                          |                                 |                   |
| Human African trypanosomiasis        |                               |                                              |                       |                                          |                                 |                   |
| Leptospirosis                        |                               |                                              |                       |                                          |                                 |                   |
| Rabies                               |                               |                                              |                       |                                          |                                 |                   |
| Schistosomiasis                      |                               |                                              |                       |                                          |                                 |                   |
| Soil transmitted Helminthes          |                               |                                              |                       |                                          |                                 |                   |
| Food born trematods                  |                               |                                              |                       |                                          |                                 |                   |

10. What do you think about the mode of transmission?

| List of NTZD                         | Major risk factors       |                                   |           |             |                        |        |
|--------------------------------------|--------------------------|-----------------------------------|-----------|-------------|------------------------|--------|
|                                      | Body fluid/blood contact | Direct contact (skin penetration) | Ingestion | Animal bite | Vectors and reservoirs | Others |
| Anthrax                              |                          |                                   |           |             |                        |        |
| Brucellosis                          |                          |                                   |           |             |                        |        |
| Bovine tuberculosis                  |                          |                                   |           |             |                        |        |
| T.saginata (Cysticercosis)           |                          |                                   |           |             |                        |        |
| Cystic echinococcosis (hydatidiosis) |                          |                                   |           |             |                        |        |
| Leishmaniasis                        |                          |                                   |           |             |                        |        |
| Human African trypanosomiasis        |                          |                                   |           |             |                        |        |
| Leptospirosis                        |                          |                                   |           |             |                        |        |
| Rabies                               |                          |                                   |           |             |                        |        |
| Schistosomiasis                      |                          |                                   |           |             |                        |        |
| Soil transmitted Helminthes          |                          |                                   |           |             |                        |        |
| Food born trematods                  |                          |                                   |           |             |                        |        |

11. Did you get any opportunity to attended training on NTZD? 0. Yes 1. No

12. If yes, to Q11, when and on which topics? \_\_\_\_\_

13. Do you provide awareness creation training about NTZD in your zone?

0 Yes 1. NO

14. If yes, to Q13, on which topics disease did you proved training?
